# Supplementary material for: Cell–cell coupling and DNA methylation abnormal phenotypes in the after-hours mice
Source: PubMed Central journal article supplement (PMC7789812; doi:10.1186/s13072-020-00373-5), 2021-01-06

**FIGURE S1**

**A**

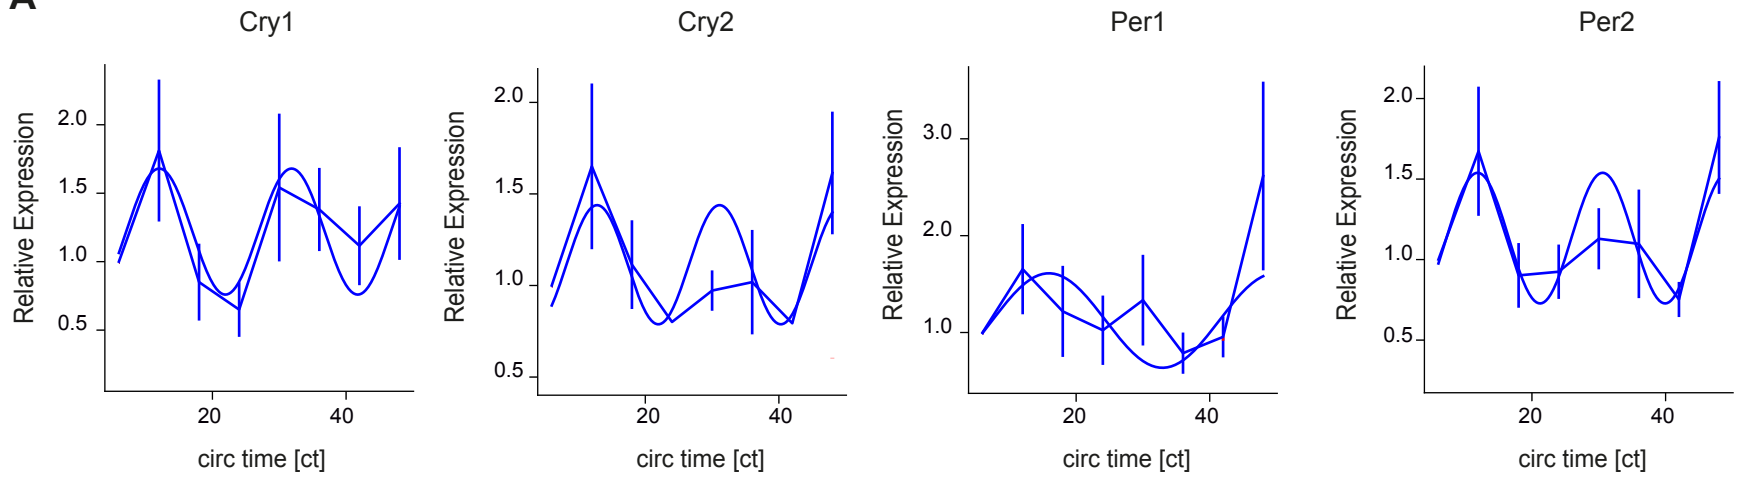

Supplement: 13072_2020_373_MOESM1_ESM.pdf [file 13072_2020_373_MOESM1_ESM.pdf]
